# Supplementary material for: Noncommunicable Disease Service Utilization among Expatriate Patients in Thailand: An Analysis of Hospital Service Data, 2014–2018
Source: MDPI journal article supplement (doi:10.3390/ijerph18189721), 2021-09-15
Supplement: s1 [file s1]

**Table S1.** Factors associated with NCD service utilization for OP visits among expatriate patients in Table 2014-2018. (Substituting missing data with the value that showed percentage majority).

| Factors                       | Bivariate analysis by<br>Chi square test |         | Multivariable<br>logistic regression |         |
|-------------------------------|------------------------------------------|---------|--------------------------------------|---------|
|                               | Crude OR<br>(95% CI)                     | P-value | Adjusted OR<br>(95% CI)              | P-value |
| Female (vs. male)             | 1.19 (1.16–1.22)                         | <0.001  | 1.17 (1.15–1.20)                     | <0.001  |
| Age group (vs. 15 – 59 years) |                                          |         |                                      | <0.001  |
| 60 years and over             | 1.56 (1.50–1.62)                         | <0.001  | 1.35 (1.29–1.41)                     | <0.001  |
| CLMV (vs. non-CLMV)           | 0.74 (0.71–0.77)                         | <0.001  | 0.84 (0.8–0.88)                      | <0.001  |
| Married status (vs. Single)   |                                          |         |                                      | <0.001  |
| Married                       | 1.20 (1.18–1.23)                         | <0.001  | 1.09 (1.06–1.11)                     | <0.001  |
| Other                         | 1.97 (1.78–2.18)                         | <0.001  | 1.52 (1.37–1.69)                     | <0.001  |
| Service areas (vs. North)     |                                          |         |                                      | <0.001  |
| Central                       | 0.76 (0.74–0.78)                         | <0.001  | 0.82 (0.79–0.84)                     | <0.001  |
| North Eastern                 | 0.93 (0.90–0.97)                         | 0.001   | 0.92 (0.88–0.95)                     | <0.001  |
| South                         | 0.76 (0.73–0.78)                         | <0.001  | 0.82 (0.79–0.85)                     | <0.001  |
| Uninsured (vs. insured)       | 0.96 (0.94–0.98)                         | <0.001  | 0.93 (0.91–0.95)                     | <0.001  |
| Year of service (vs. 2014)    |                                          |         |                                      | <0.001  |
| 2015                          | 0.96 (0.93–0.99)                         | 0.025   | 0.99 (0.95–1.02)                     | 0.420   |
| 2016                          | 0.93 (0.90–0.97)                         | <0.001  | 0.96 (0.93–0.99)                     | 0.016   |
| 2017                          | 0.97 (0.94–1.01)                         | 0.130   | 0.99 (0.96–1.03)                     | 0.745   |
| 2018                          | 1.01 (0.98–1.05)                         | 0.367   | 1.05 (1.02–1.08)                     | 0.003   |

**Table S2.** Factors associated with NCD service utilization in IP care among expatriate patients in Table 2014-2018. (Substituting missing data with the value that showed percentage majority).

| Factors                               | Bivariate analysis by<br>Chi square test |         | Multivariable<br>Logistic regression |         |
|---------------------------------------|------------------------------------------|---------|--------------------------------------|---------|
|                                       | Crude OR<br>(95% CI)                     | P-value | Adjusted OR<br>(95% CI)              | P-value |
| Female (vs. male)                     | 0.48 (0.42–0.55)                         | <0.001  | 0.49 (0.43–0.57)                     | <0.001  |
| 60 years and over (vs. 15 – 59 years) | 2.14 (1.82–2.52)                         | <0.001  | 1.69 (1.41–2.04)                     | <0.001  |
| CLMV (vs. non-CLMV)                   | 0.68 (0.55–0.85)                         | 0.001   | 1.35 (1.05–1.74)                     | 0.019   |
| Service areas (vs. North)             |                                          |         |                                      | <0.001  |
| Central                               | 0.69 (0.58–0.82)                         | <0.001  | 0.73 (0.61–0.87)                     | <0.001  |
| North Eastern                         | 1.39 (1.15–1.68)                         | 0.001   | 1.37 (1.12–1.66)                     | 0.002   |
| South                                 | 0.59 (0.48–0.72)                         | <0.001  | 0.63 (0.52–0.78)                     | <0.001  |
| Year of service (vs. 2014)            |                                          |         |                                      | 0.172   |
| 2015                                  | 0.96 (0.81–1.14)                         | 0.632   | 1.04 (0.87–1.24)                     | 0.660   |
| 2017                                  | 1.05 (0.88–1.25)                         | 0.593   | 1.11 (0.92–1.34)                     | 0.260   |
| 2018                                  | 1.19 (0.98–1.43)                         | 0.072   | 1.23 (1.01–1.49)                     | 0.036   |

**Table S3.** Factors associated with NCD service utilization for OP visits among expatriate patients in Thailand, 2014–2018 (Substituting missing data with the value that showed percentage minority).

| Factors                       | Bivariate analysis by<br>Chi square test |         | Multivariable<br>logistic regression |         |
|-------------------------------|------------------------------------------|---------|--------------------------------------|---------|
|                               | Crude OR<br>(95% CI)                     | P-value | Adjusted OR<br>(95% CI)              | P-value |
| Female (vs. male)             | 1.19 (1.17–1.22)                         | <0.001  | 1.17 (1.15–1.20)                     | <0.001  |
| Age group (vs. 15 – 59 years) |                                          |         |                                      | <0.001  |
| 60 years and over             | 1.55 (1.49–1.62)                         | <0.001  | 1.37 (1.31–1.43)                     | <0.001  |
| CLMV (vs. non-CLMV)           | 0.74 (0.71–0.77)                         | <0.001  | 0.84 (0.8–0.88)                      | <0.001  |
| Married status (vs. Single)   |                                          |         |                                      | <0.001  |
| Married                       | 1.20 (1.17–1.22)                         | <0.001  | 1.08 (1.05–1.1)                      | <0.001  |
| Other                         | 1.40 (1.34–1.47)                         | <0.001  | 1.24 (1.18–1.3)                      | <0.001  |
| Service areas (vs. North)     |                                          |         |                                      | <0.001  |
| Central                       | 0.76 (0.74–0.78)                         | <0.001  | 0.82 (0.79–0.84)                     | <0.001  |
| North Eastern                 | 0.93 (0.90–0.97)                         | 0.001   | 0.91 (0.88–0.95)                     | <0.001  |
| South                         | 0.76 (0.73–0.78)                         | <0.001  | 0.81 (0.78–0.84)                     | <0.001  |
| Uninsured (vs. insured)       | 0.96 (0.94–0.98)                         | <0.001  | 0.93 (0.91–0.95)                     | <0.001  |
| Year of service (vs. 2014)    |                                          |         |                                      | <0.001  |

|      |                  |        |                  |       |
|------|------------------|--------|------------------|-------|
| 2015 | 0.96 (0.93–0.99) | 0.025  | 0.98 (0.95–1.02) | 0.406 |
| 2016 | 0.93 (0.90–0.97) | <0.001 | 0.96 (0.93–0.99) | 0.020 |
| 2017 | 0.97 (0.94–1.01) | 0.130  | 0.99 (0.96–1.03) | 0.778 |
| 2018 | 1.01 (0.98–1.05) | 0.367  | 1.05 (1.02–1.08) | 0.003 |

**Table S4.** Factors associated with NCD service utilization in IP care among expatriate patients in Thailand, 2014–2018 (Substituting missing data with the value that showed percentage minority).

| Factors                               | Bivariate analysis by<br>Chi square test |         | Multivariable<br>Logistic regression |         |
|---------------------------------------|------------------------------------------|---------|--------------------------------------|---------|
|                                       | Crude OR<br>(95% CI)                     | P-value | Adjusted OR<br>(95% CI)              | P-value |
| Female (vs. male)                     | 0.48 (0.42–0.54)                         | <0.001  | 0.49 (0.43–0.57)                     | <0.001  |
| 60 years and over (vs. 15 – 59 years) | 2.14 (1.82–2.52)                         | <0.001  | 1.68 (1.40–2.03)                     | <0.001  |
| CLMV (vs. non-CLMV)                   | 0.68 (0.55–0.85)                         | 0.001   | 1.35 (1.05–1.74)                     | 0.021   |
| Service areas (vs. North)             |                                          |         |                                      | <0.001  |
| Central                               | 0.69 (0.58–0.82)                         | <0.001  | 0.73 (0.61–0.87)                     | <0.001  |
| North Eastern                         | 1.39 (1.15–1.68)                         | 0.001   | 1.37 (1.12–1.66)                     | 0.002   |
| South                                 | 0.59 (0.48–0.72)                         | <0.001  | 0.63 (0.52–0.78)                     | <0.001  |
| Year of service (vs. 2014)            |                                          |         |                                      | 0.171   |
| 2015                                  | 0.96 (0.81–1.14)                         | 0.632   | 1.04 (0.87–1.24)                     | 0.657   |
| 2017                                  | 1.05 (0.88–1.25)                         | 0.593   | 1.11 (0.92–1.34)                     | 0.259   |
| 2018                                  | 1.19 (0.98–1.43)                         | 0.072   | 1.23 (1.01–1.50)                     | 0.035   |
